# Supplementary material for: High-throughput production of cheap mineral-based two-dimensional electrocatalysts for high-current-density hydrogen evolution
Source: PubMed Central journal article supplement (PMC7381654; doi:10.1038/s41467-020-17121-8), 2020-07-24
Supplement: 41467_2020_17121_MOESM1_ESM.pdf [file 41467_2020_17121_MOESM1_ESM.pdf]

Supplementary Information for *Nature Communications*

**High-Throughput Production of Cheap Mineral-Based Two-dimensional Electrocatalysts for High-Current-Density Hydrogen Evolution**

*Zhang et al.*

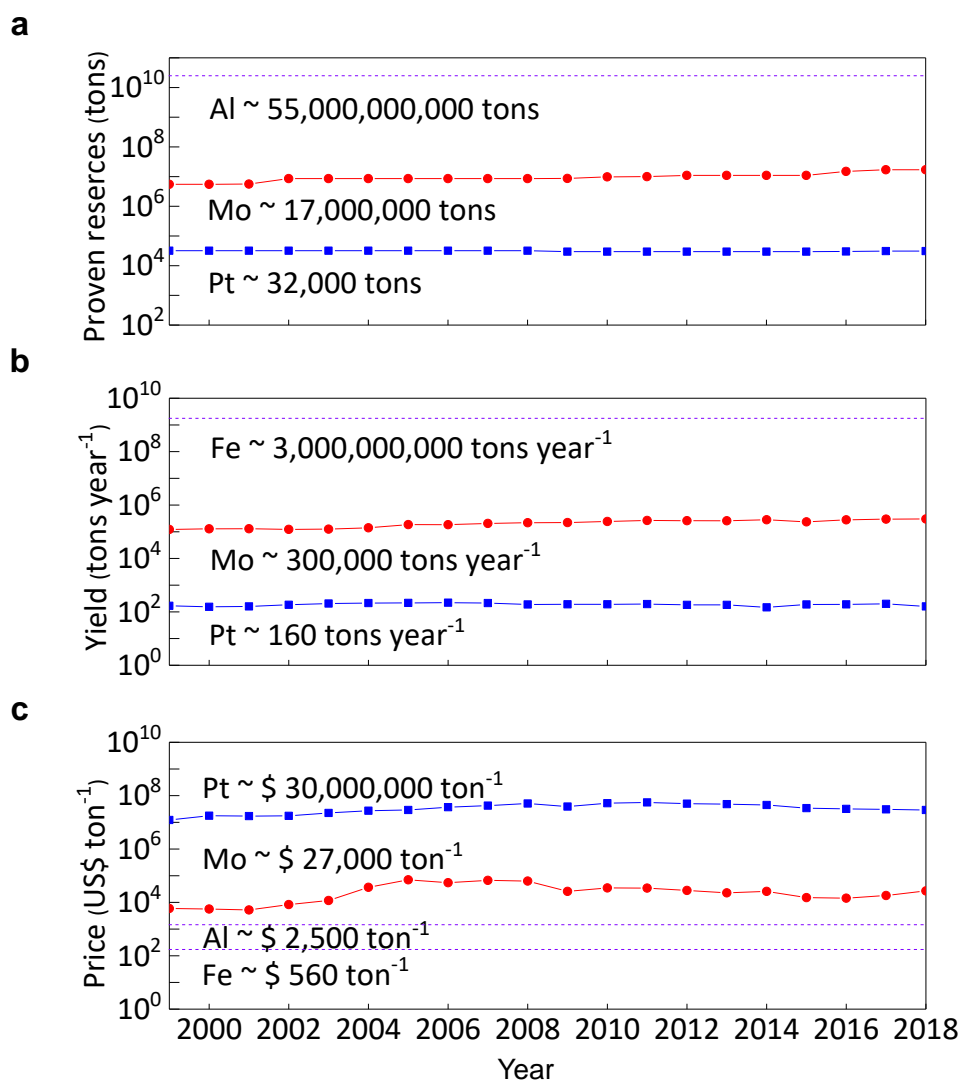

**Supplementary Figure 1. Commodity statistical data of Pt, Mo, Al, and Fe metals.** **a** Proven reserves, **b** annual yield, and **c** commodity price of these metals in the past 20 years, according to the United States Geological Survey (USGS) annual publications.<sup>1</sup> The Earth proven reserve of Pt is only about 32,000 tons, which is six orders of magnitude less than that of the most abundant element, *i.e.*, Al. These identified reserves only increased by 900 tons (2.8%) in the last 20 years, also suggesting the scarcity of Pt element. The global yield of Pt is only about 160 tons per year, which is 10 million time less than that of the most produced metal, Fe (Pig iron and raw steel). Combined with its scarcity and low yield, Pt keeps a very high price of about  $3 \times 10^7$  US\$ ton<sup>-1</sup>, while Mo ( $2.7 \times 10^4$  US\$ ton<sup>-1</sup>) is much cheaper than Pt.

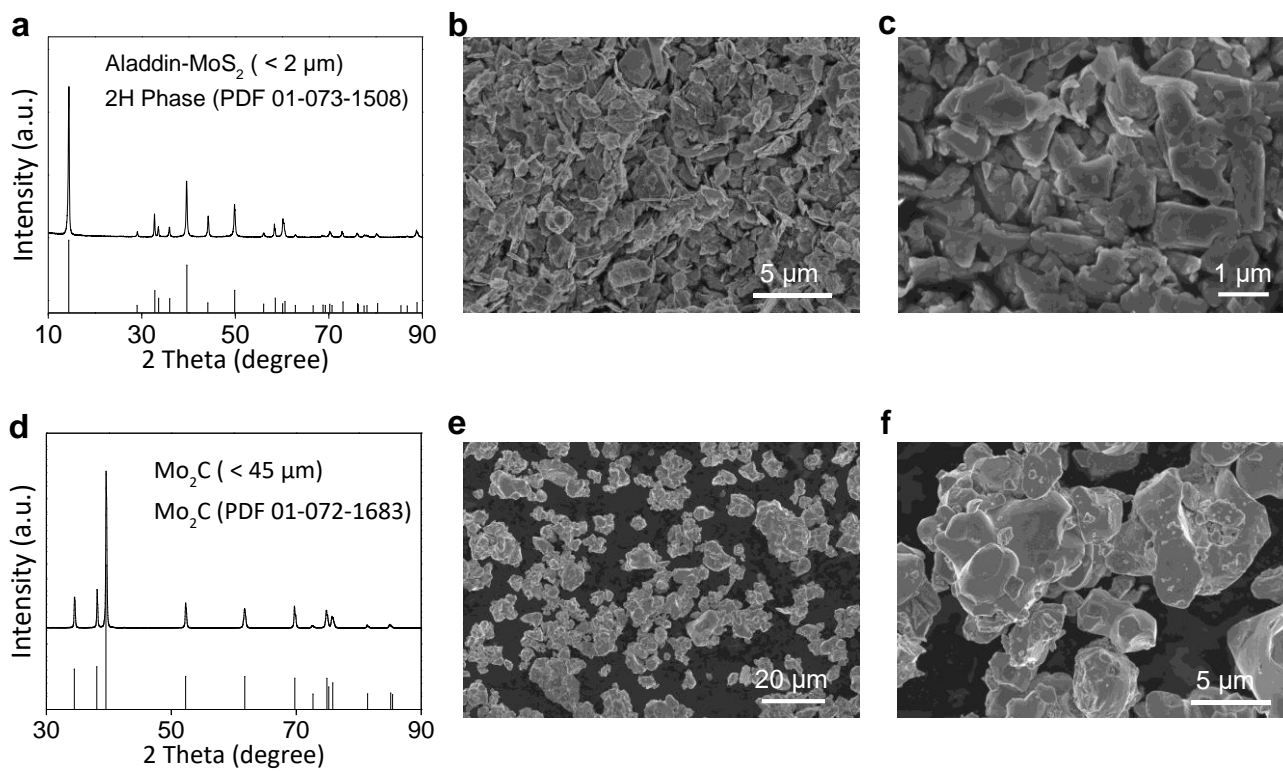

**Supplementary Figure 2. Characterization of the raw materials.** a-c The high-purity bulk MoS<sub>2</sub> and d-f the Mo<sub>2</sub>C force intermediates used in the intermediate-assisted grinding exfoliation (iMAGE) process. a,d XRD patterns, b,d low and c,f high magnification SEM images.

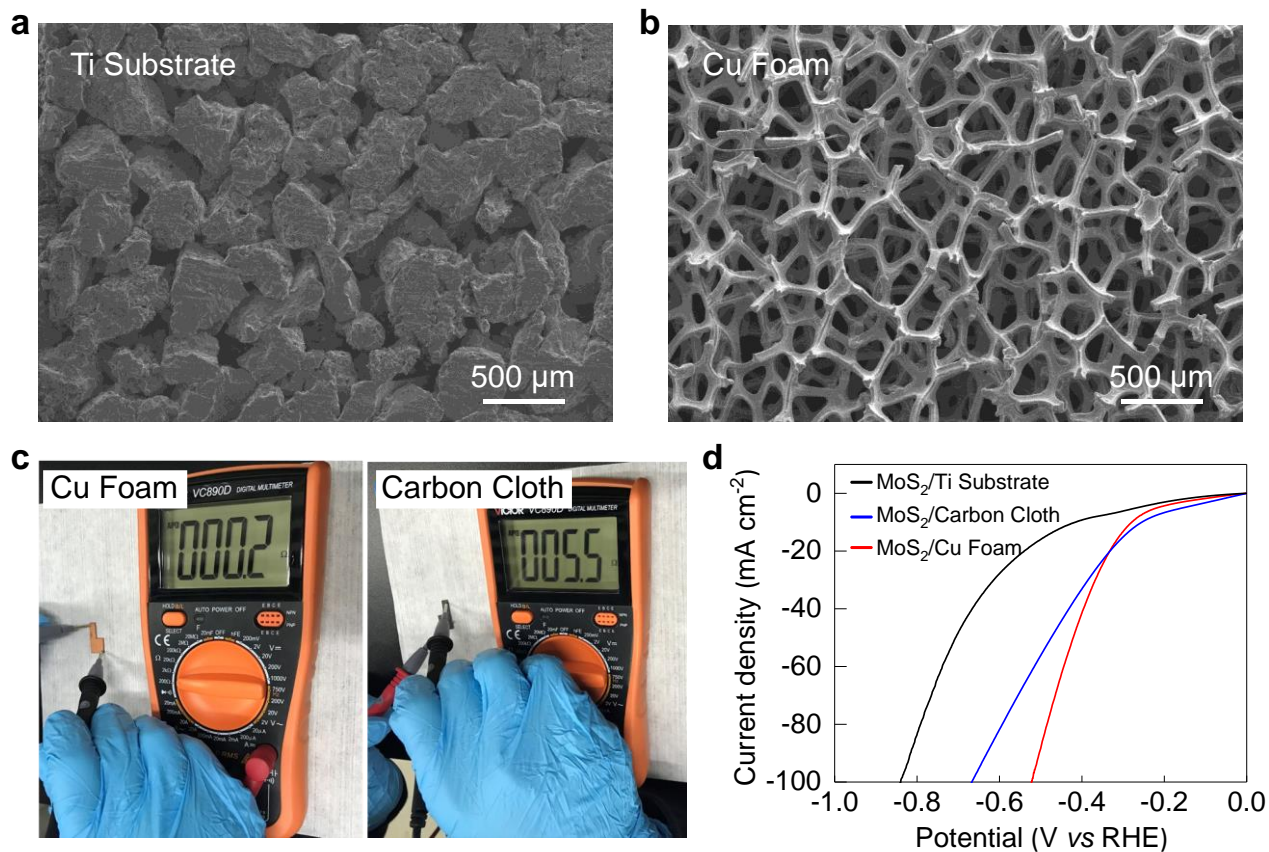

**Supplementary Figure 3. 2D MoS<sub>2</sub> electrocatalysts prepared on different supports by the method in Figure 1a in the main text. a, b** SEM images of the **a** Ti substrate and **b** Cu foam supports. **c** Electrical resistance of Cu foam and carbon cloth with same size. **d** HER polarization curves of the 2D MoS<sub>2</sub> catalyst (4 mg cm<sup>-2</sup>) on three different supports. The results show that 2D MoS<sub>2</sub> loaded on all three conductive supports show certain HER activity, and the performance is related to the porosity and electrical conductivity of the supports.

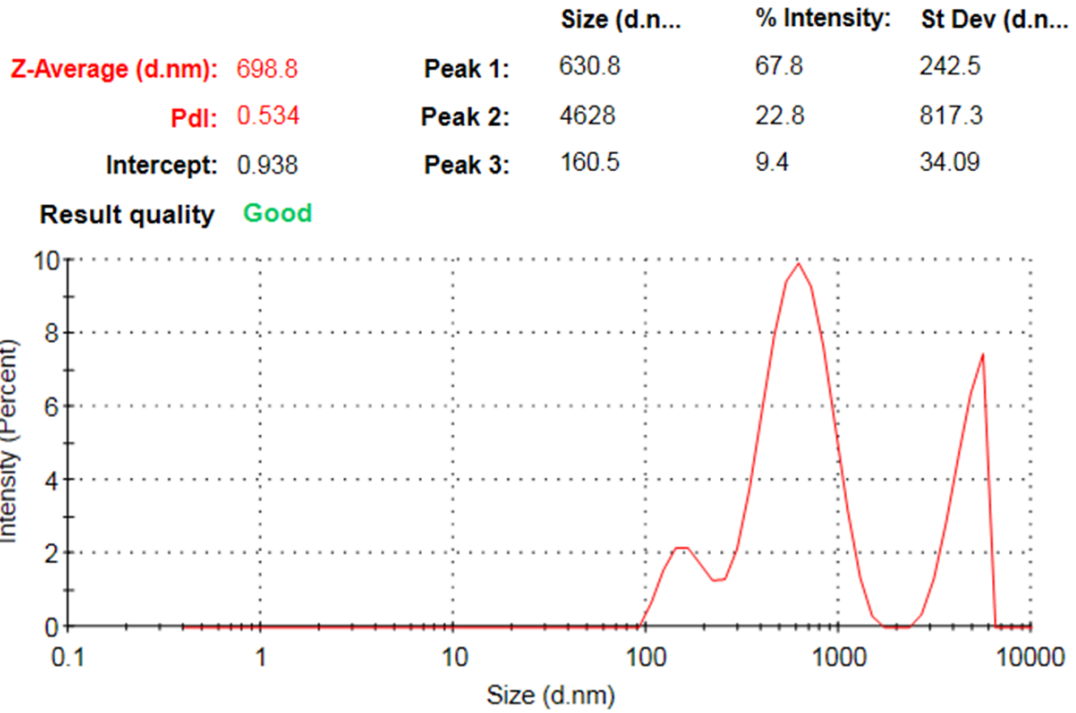

**Supplementary Figure 4. Dynamic light scattering (DLS) measurements of the exfoliated 2D MoS<sub>2</sub>.** The results show that the average flake size is about 700 nm, consistent with the AFM and TEM results.

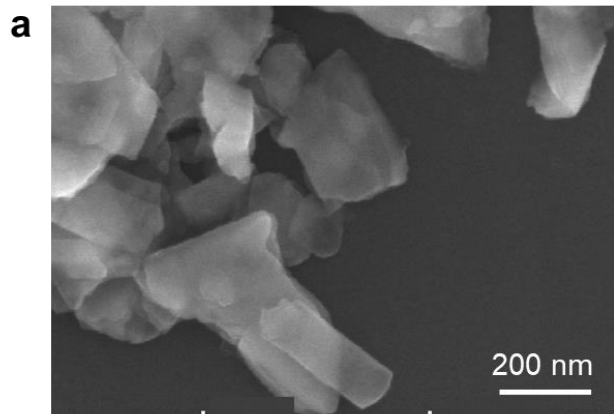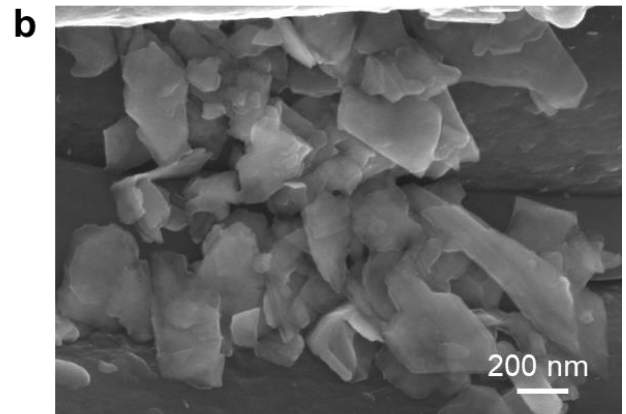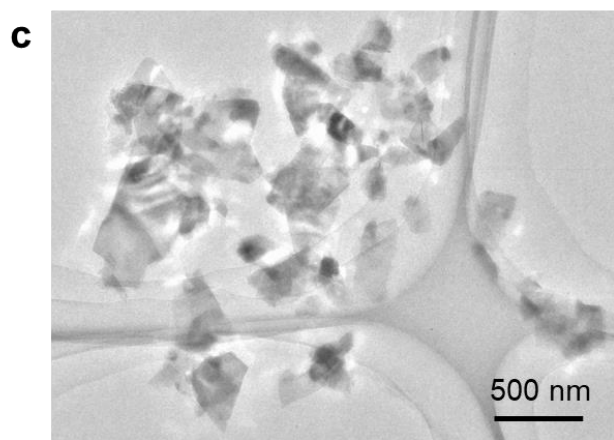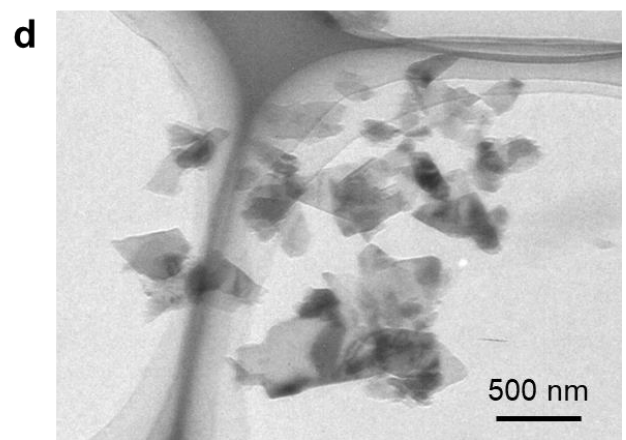

**Supplementary Figure 5. Morphology of the iMAGE method exfoliated 2D MoS<sub>2</sub> flakes. a,b SEM and c,d TEM images.**

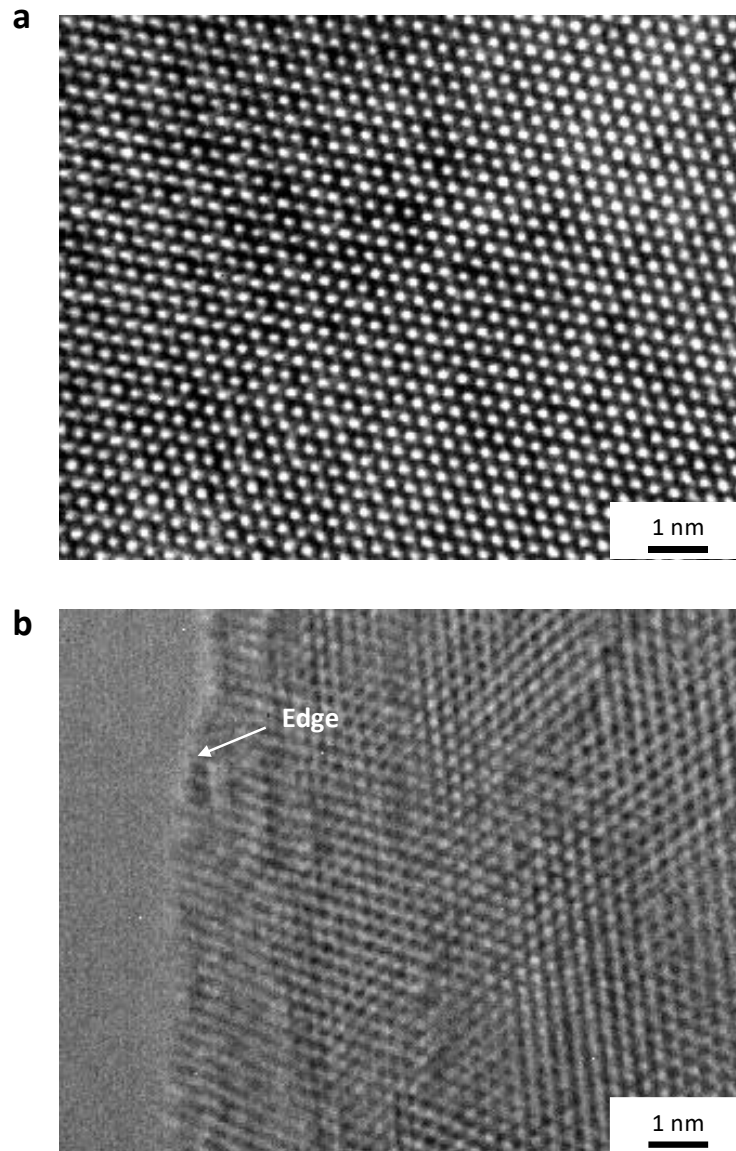

**Supplementary Figure 6.** HRTEM images of the exfoliated 2D MoS<sub>2</sub>. **a** the basal plane and **b** the edge of a 2D MoS<sub>2</sub> flake.



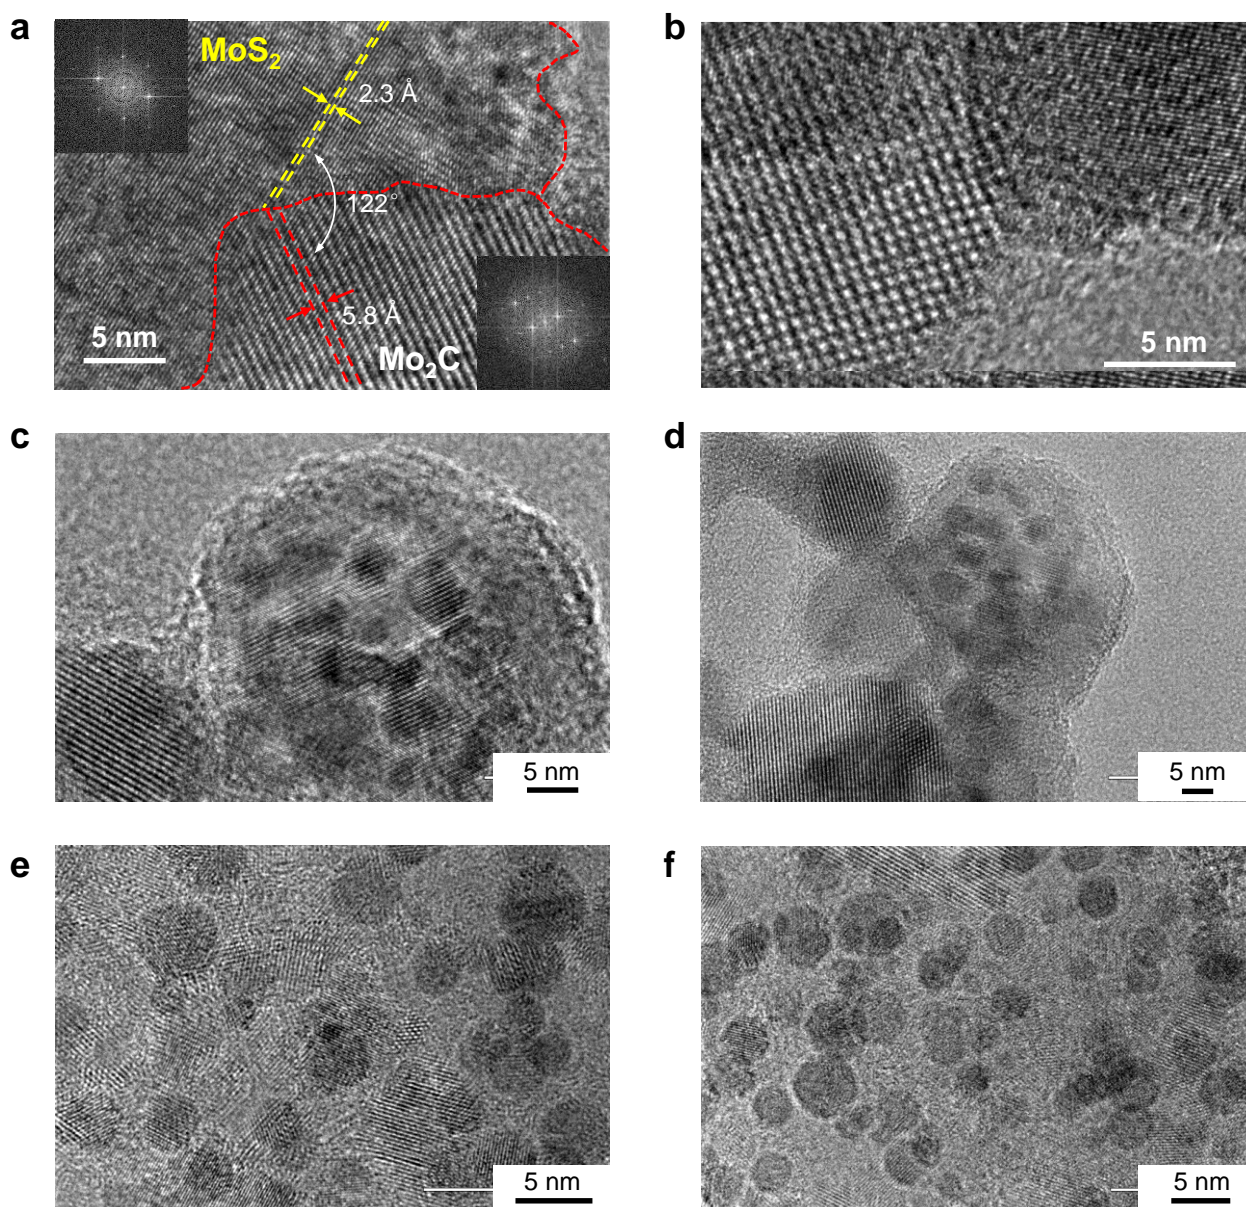

**Supplementary Figure 7. Microstructural of HC-MoS<sub>2</sub>/Mo<sub>2</sub>C electrocatalysts.** a-f HRTEM images of the HC-MoS<sub>2</sub>/Mo<sub>2</sub>C electrocatalyst, showing the formation of many nanosized MoS<sub>2</sub>/Mo<sub>2</sub>C lateral heterostructures. The Mo<sub>2</sub>C nanocrystals are decorated the basal planes and edges of 2D MoS<sub>2</sub> flakes. In Figure S7a, the *d*-spacing of 2.3 Å is corresponding to that of MoS<sub>2</sub> (103) facet, and the *d*-spacing of 5.8 Å is in agreement with Mo<sub>2</sub>C lattice constant in the *b* direction.<sup>2</sup> At the boundary of Mo<sub>2</sub>C and MoS<sub>2</sub>, the intersection angle between them is 122°, a value close to the 120° due to the three-fold symmetry of the MoS<sub>2</sub>. These results indicated that the matrix structure of MoS<sub>2</sub> is important for obtaining MoS<sub>2</sub>/Mo<sub>2</sub>C heterostructures.



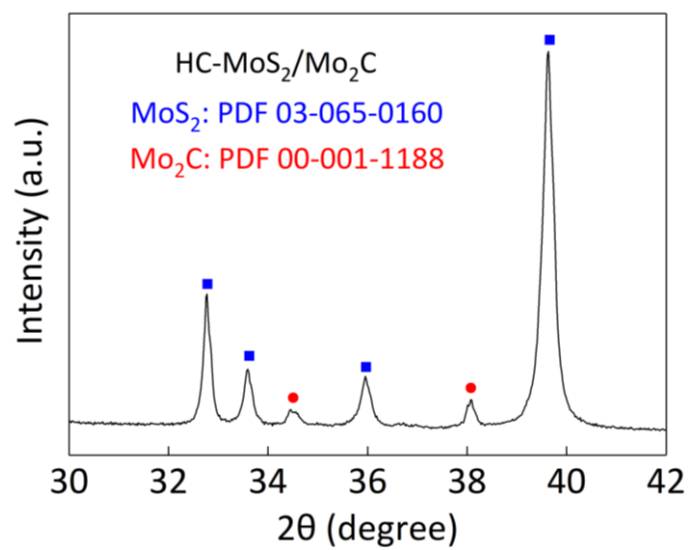

**Supplementary Figure 8. Fine structure of the XRD pattern of the HC-MoS<sub>2</sub>/Mo<sub>2</sub>C catalyst.** The result shows that the HC-MoS<sub>2</sub>/Mo<sub>2</sub>C is composed of MoS<sub>2</sub> and Mo<sub>2</sub>C.

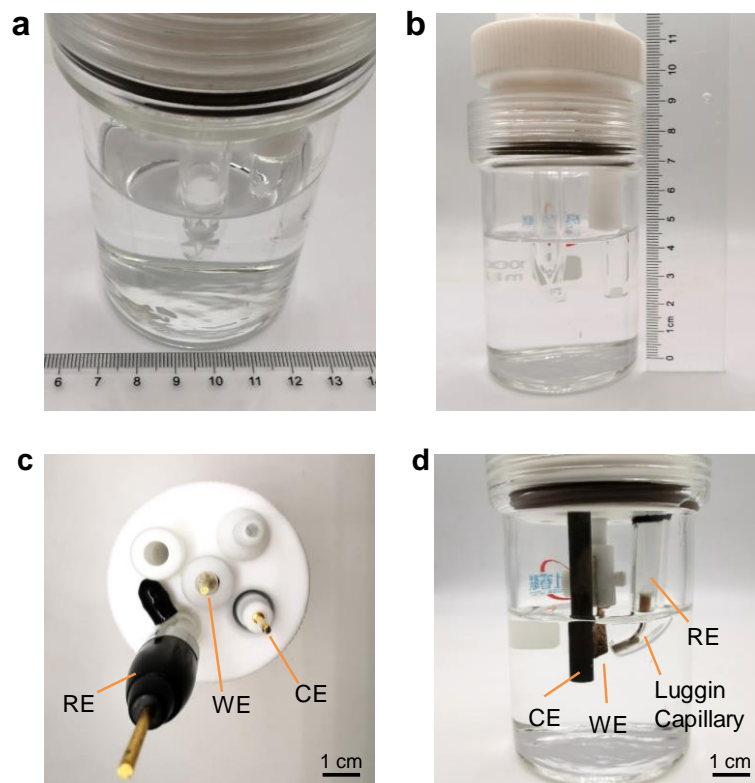

**Supplementary Figure 9.** Photos of the electrolysis cell for performing electrochemical tests. **a,b** Photos showing the size of the electrolysis cell. **c,d** Photos showing the positions and distances between working, counter, and reference electrodes. These photos show that the cell and test parameters were kept identical in each test to make the electrochemical test reliable.

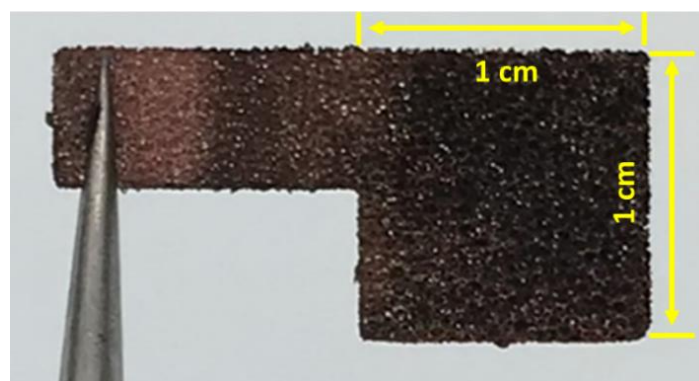

**Supplementary Figure 10.** A photo of a HC-MoS<sub>2</sub>/Mo<sub>2</sub>C working electrode. It shows an apparent surface area of 1 cm<sup>2</sup>.

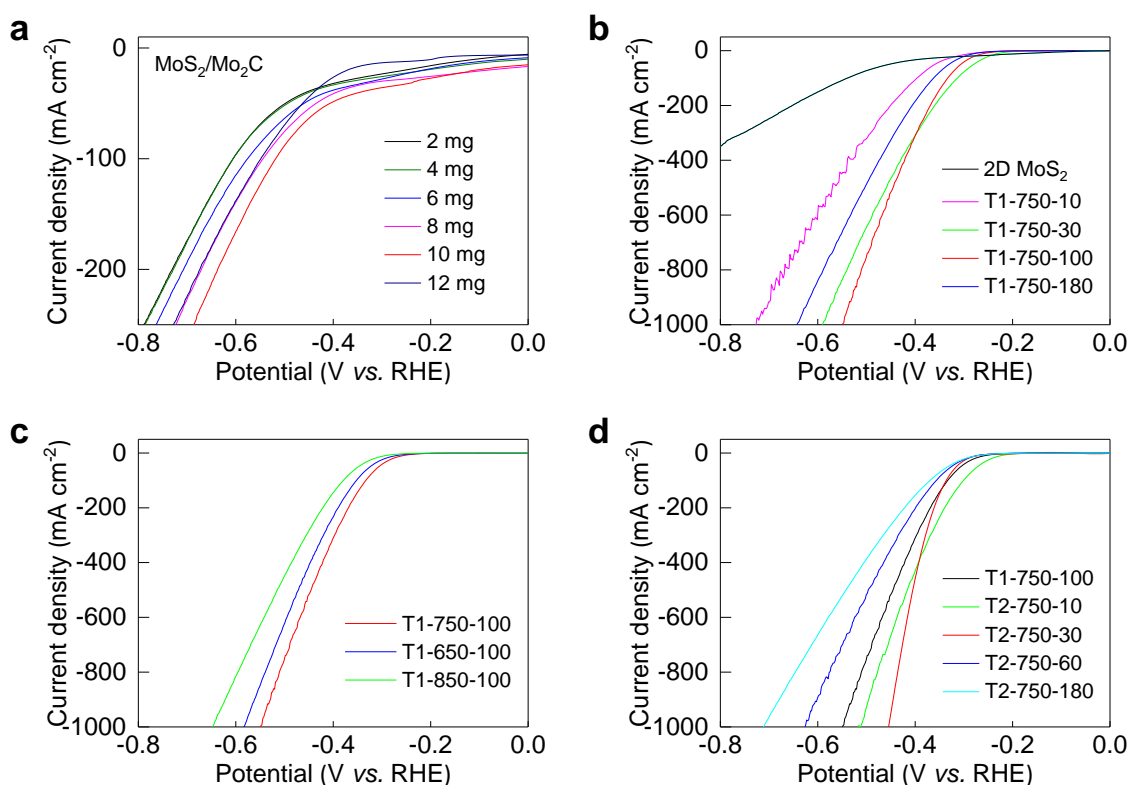

**Supplementary Figure 11. Optimization of the HER performance of the MoS<sub>2</sub>-based catalysts.**

The tuned parameters include **a** loading amounts of 2D MoS<sub>2</sub> on Cu foam, **b** time in the hydrogen treatment process, **c** temperature in the hydrogen treatment process, and **d** time in the carbonization treatment process. In a typical procedure, Cu foam loaded with 2D MoS<sub>2</sub> (2-12 mg cm<sup>-2</sup>) was placed in a quartz boat in the center of a 1.5 in. diameter quartz tube furnace. For H<sub>2</sub> treatment (denoted as T1), the furnace was first kept at given temperature (650, 750, or 850 °C) in a mixture of Ar (25 sccm) and H<sub>2</sub> (7.5 sccm) for different times (10, 30, 100, or 180 min), after which S vacancies had been formed in the 2D MoS<sub>2</sub>. This was followed by CH<sub>4</sub> treatment (denoted as T2), in which the H<sub>2</sub>-treated sample was held at an optimum temperature of 750 °C in a mixture of Ar (25 sccm), H<sub>2</sub> (2.5 sccm) and CH<sub>4</sub> (2.5 sccm) for different times (10, 30, 60 or 180 min) in order to partially convert the MoS<sub>2</sub> into Mo<sub>2</sub>C nanocrystals. All these samples are denoted in the form of “T1/2-temperature-time”. The first-step optimized H<sub>2</sub> treated sample (T1-750-100) is denoted as H-MoS<sub>2</sub>, and the final optimized sample (T2-750-30) is denoted as HC-MoS<sub>2</sub>/Mo<sub>2</sub>C. All tests were done in 0.5 M H<sub>2</sub>SO<sub>4</sub>.

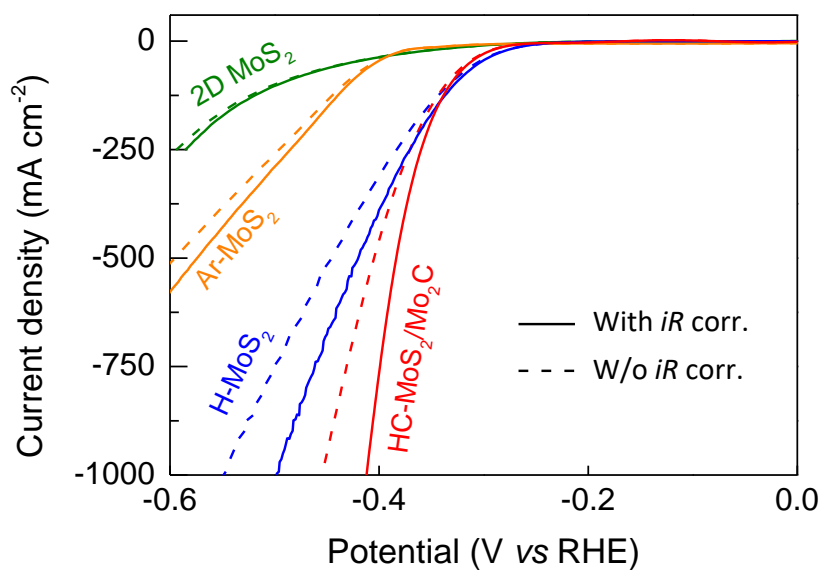

**Supplementary Figure 12. Optimization of HER performance of MoS<sub>2</sub>-based electrocatalysts.**

Polarization curves of different MoS<sub>2</sub>-based samples **a** without *iR* correction and **b** with *iR* correction.

The catalysts of 2D MoS<sub>2</sub> with only Ar and Ar/H<sub>2</sub> treatments are denoted as Ar-MoS<sub>2</sub> and H-MoS<sub>2</sub>.

All tests were done in 0.5 M H<sub>2</sub>SO<sub>4</sub>.

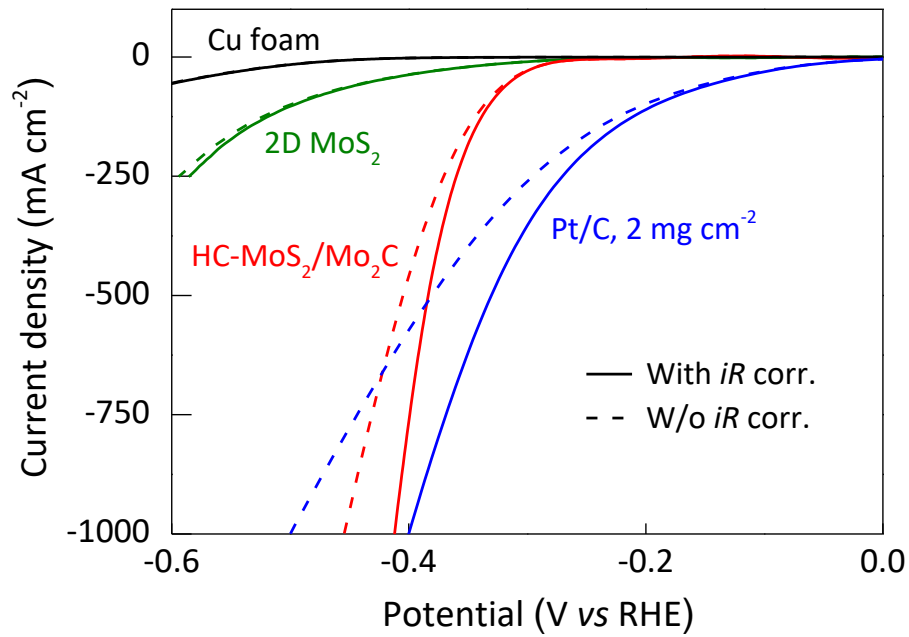

**Supplementary Figure 13. Polarization curves.** Samples include HC-MoS<sub>2</sub>/Mo<sub>2</sub>C, 2D MoS<sub>2</sub>, Pt/C loaded on Cu foam (2 mg cm<sup>-2</sup>), and bare Cu foam. The tests were done in 0.5 M H<sub>2</sub>SO<sub>4</sub> electrolytes, where the data with *iR* correction were shown in Figure 3a in the manuscript.

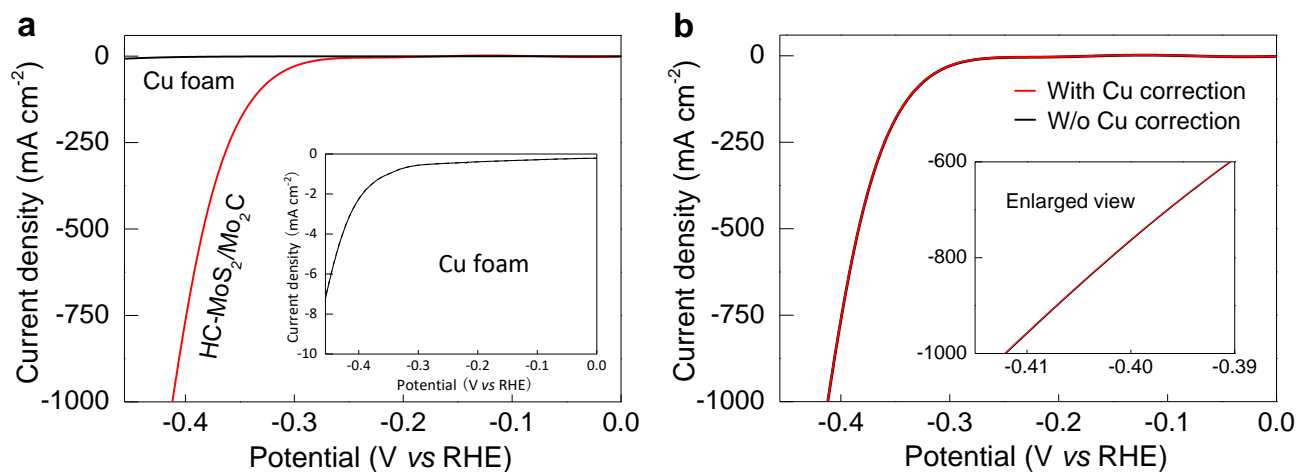

**Supplementary Figure 14. The effect of Cu foam on catalyst performance. a** Polarization curves of the HC-MoS<sub>2</sub>/Mo<sub>2</sub>C on Cu foam and the bare Cu foam. The inset is the enlarged view of the Cu foam. The results showed that the performance of Cu foam in the potential window of HC-MoS<sub>2</sub>/Mo<sub>2</sub>C is negligible. **b** Polarization curves of HC-MoS<sub>2</sub>/Mo<sub>2</sub>C before and after being corrected by Cu signals. The inset is the enlarged view at high current densities. The solid lines and dotted lines denote data with and without *iR* corrections, respectively. All tests were done in 0.5M H<sub>2</sub>SO<sub>4</sub>. These results showed that the effect of Cu foam on current densities of catalysts are negligible. All data are *iR* corrected.



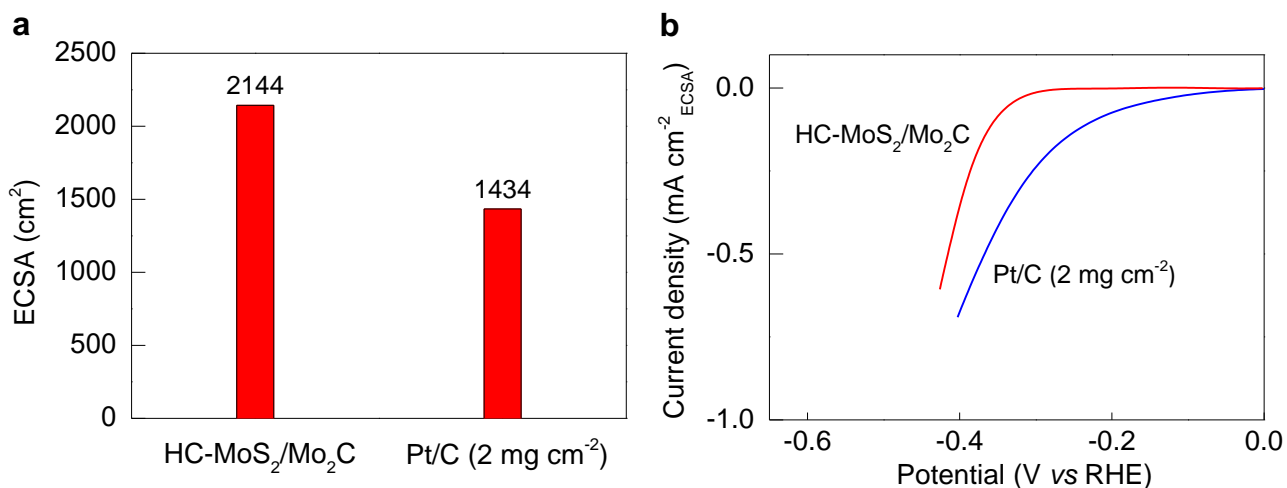

**Supplementary Figure 15. Electrochemically active surface areas (ECSA) normalized current densities.** Samples include HC-MoS<sub>2</sub>/Mo<sub>2</sub>C and the Pt/C loaded on a high-surface-area Cu foam (2 mg cm<sup>-2</sup>) and are tested in 0.5 M H<sub>2</sub>SO<sub>4</sub> solutions. **a** ECSA values and **b** ECSA-normalized polarization curves of the HC-MoS<sub>2</sub>/Mo<sub>2</sub>C and the 2 mg cm<sup>-2</sup> Pt/C with *iR* correction. The ECSA were calculated from their double layer capacitance (*C*<sub>dl</sub>) as shown in Figure S18,<sup>3,4</sup> which were 2144 cm<sup>2</sup> for the HC-MoS<sub>2</sub>/Mo<sub>2</sub>C and 1434 cm<sup>2</sup> for the 2 mg cm<sup>-2</sup> Pt/C. These results showed that the Pt catalyst had higher intrinsic activity for HER than the HC-MoS<sub>2</sub>/Mo<sub>2</sub>C catalyst.

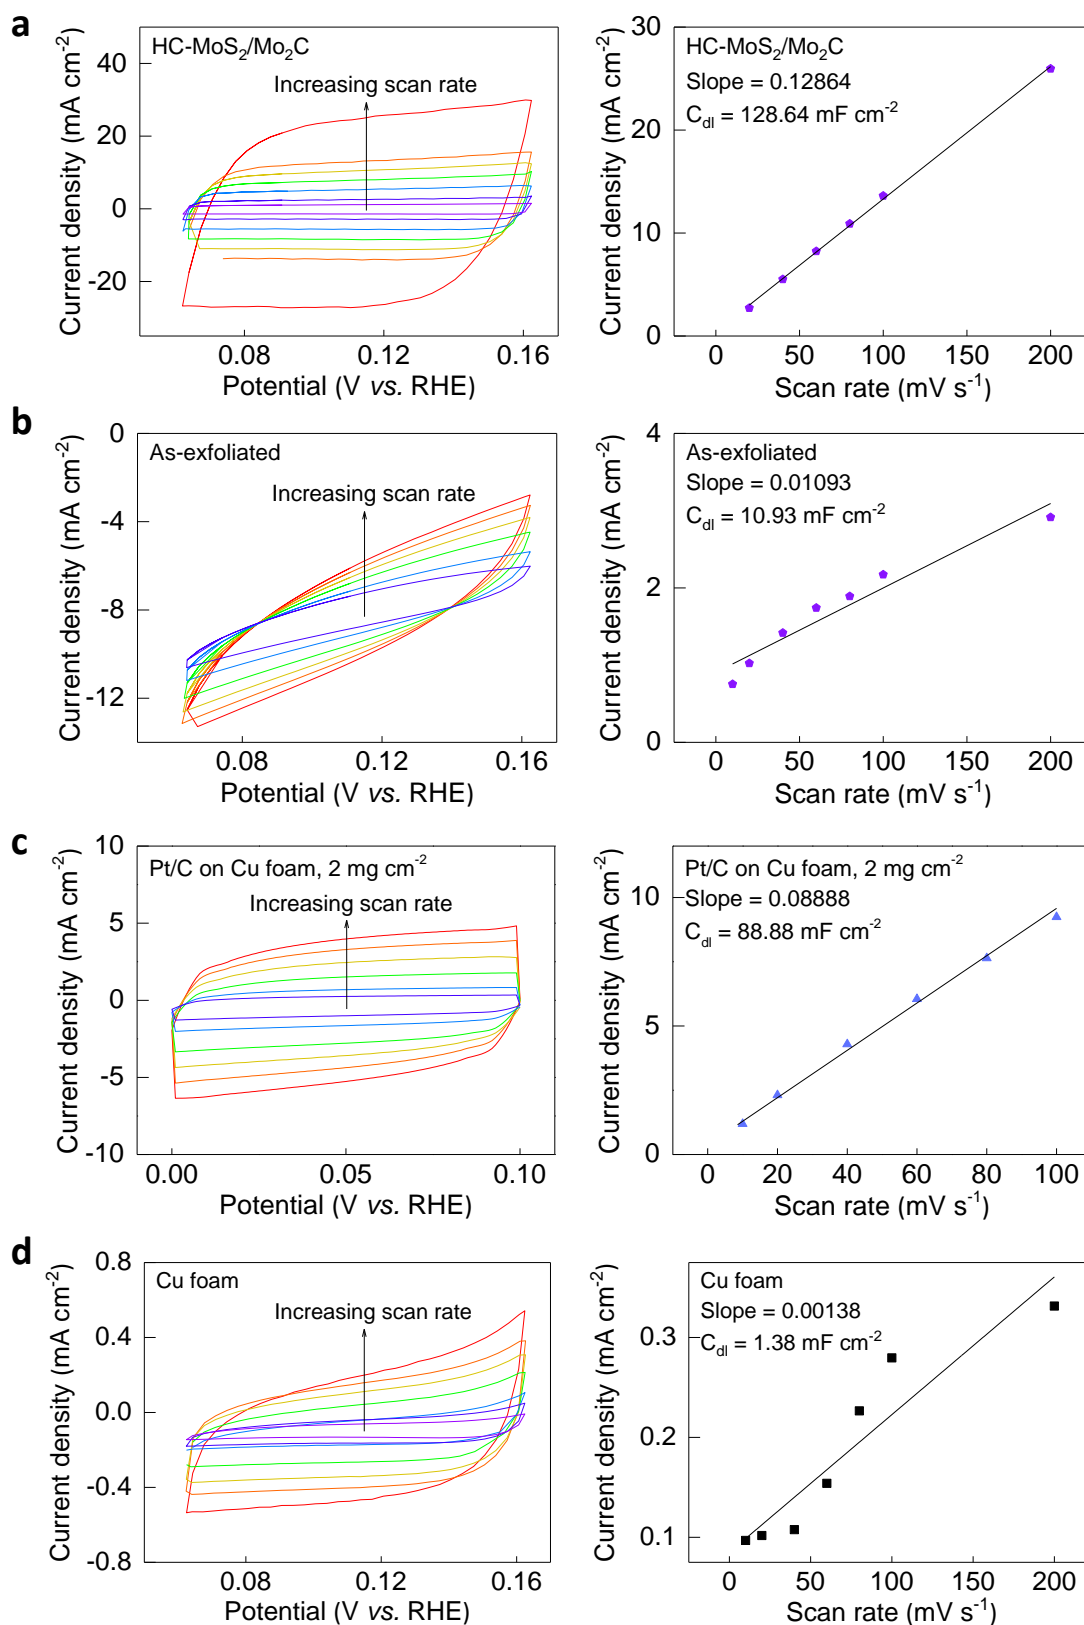

**Supplementary Figure 16. CV curves at different scan rates and the calculated  $C_{dl}$ .** **a** HC-MoS<sub>2</sub>/Mo<sub>2</sub>C, **b** As exfoliated 2D MoS<sub>2</sub>, **c** Pt/C loaded on high-surface-area Cu foam with a loading mass of 2 mg cm<sup>-2</sup>, and **d** bare Cu foam in 0.5 M H<sub>2</sub>SO<sub>4</sub>.

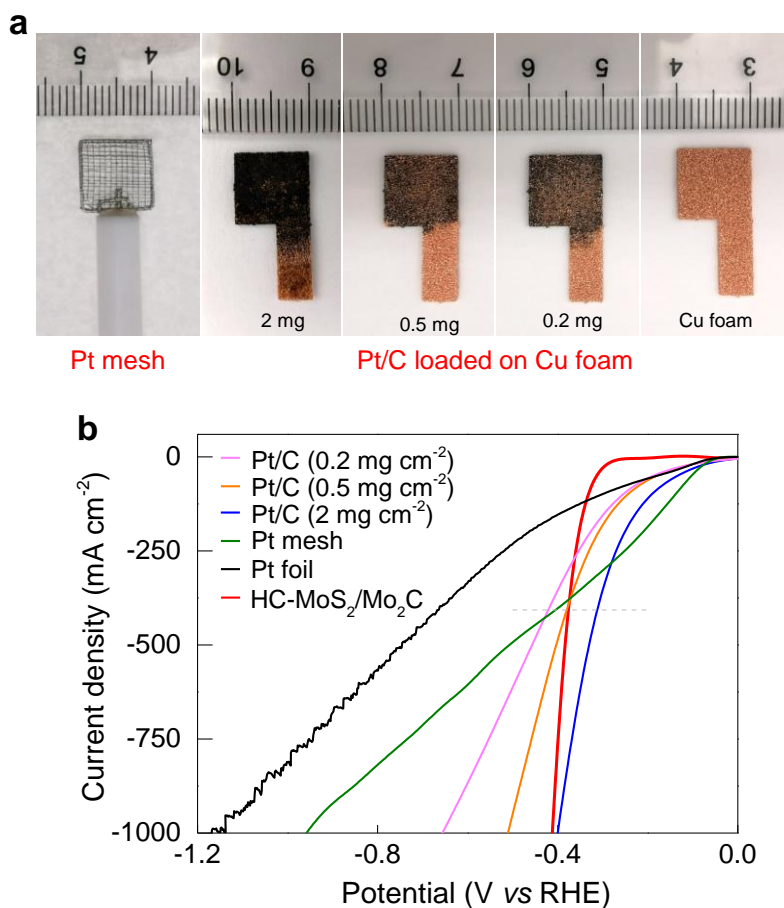

**Supplementary Figure 17. Morphology engineering of Pt-based electrocatalysts toward better high-current-density performance.** **a** Optical image of a series of Pt working electrode including Pt foil, Pt mesh, Pt/C ( $0.2$ ,  $0.5$ , and  $2 \text{ mg cm}^{-2}$ ) loaded on high-surface-area Cu foams, with an apparent surface area of  $1 \text{ cm}^2$ . **b** Polarization curves of HC-MoS<sub>2</sub>/Mo<sub>2</sub>C and these Pt catalysts tested in  $0.5 \text{ M H}_2\text{SO}_4$  with  $iR$  correction. The results showed that Pt/C on Cu foam with a high electrochemical surface area (Figure S16c) exhibited the best performance among these Pt-based electrocatalysts, and HC-MoS<sub>2</sub>/Mo<sub>2</sub>C exhibited comparable performance with the best Pt catalyst.

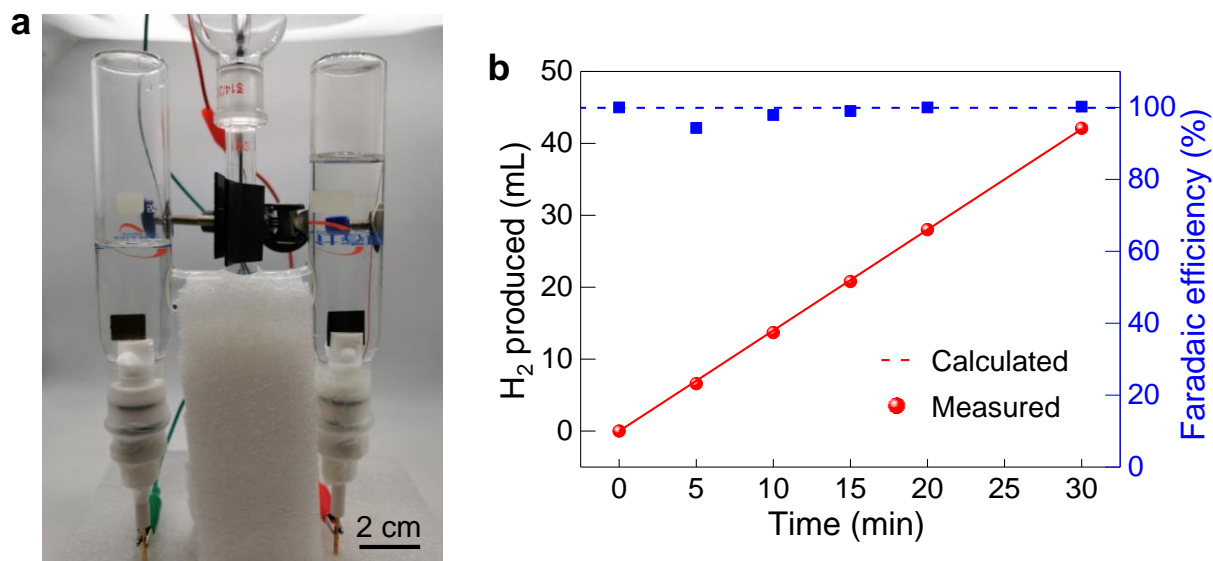

**Supplementary Figure 18. Measurements of the Faradaic efficiency of the HC-MoS<sub>2</sub>/Mo<sub>2</sub>C sample.** **a** A photo of the setup for testing Faradaic efficiency and **b** the volume of hydrogen with different durations during HER. The tests were done at 200 mA cm<sup>-2</sup>. The results showed that the HC-MoS<sub>2</sub>/Mo<sub>2</sub>C catalyst exhibited a ~100% Faradaic efficiency for HER, and the side reaction from Cu foam would be negligible.

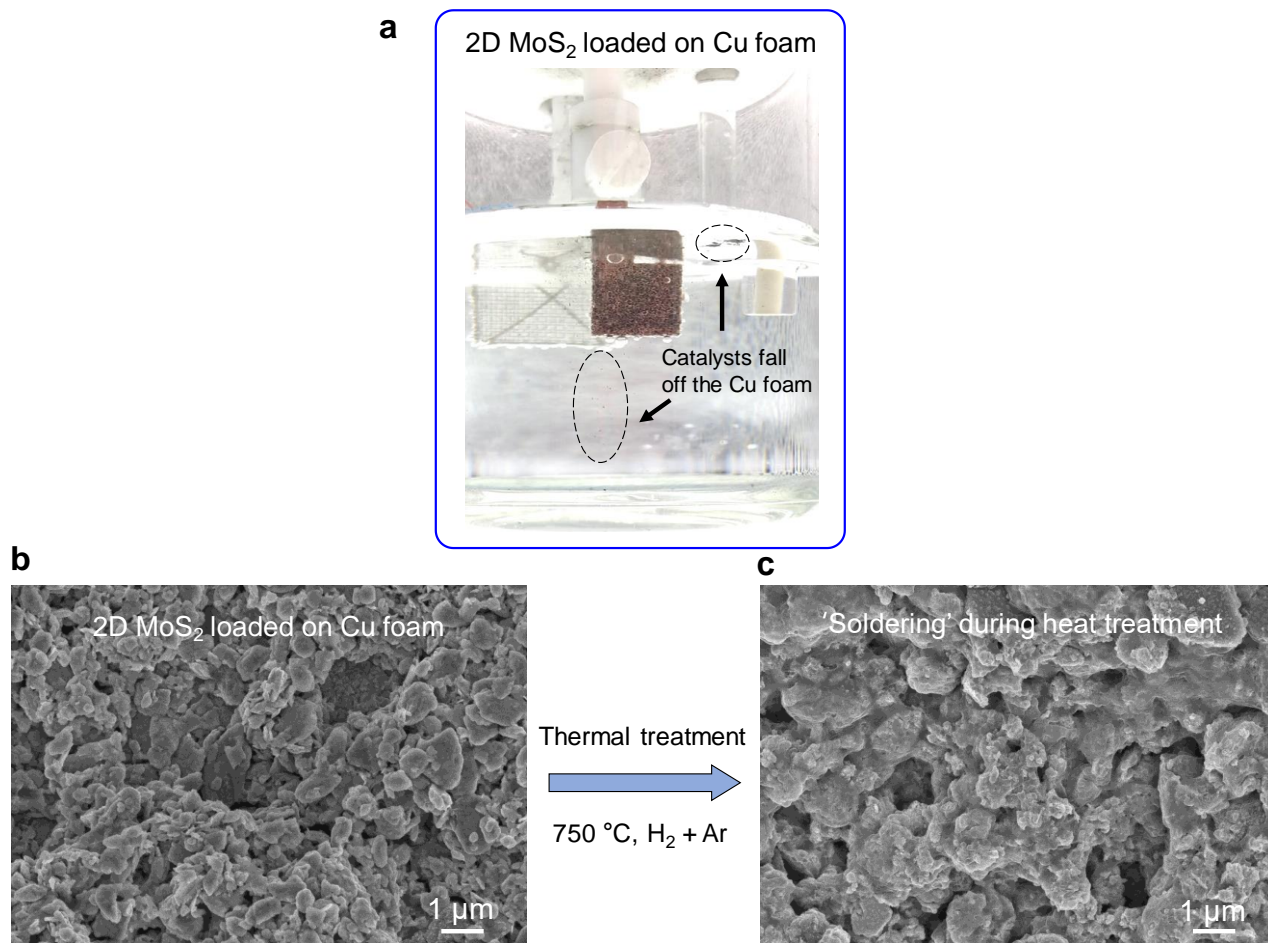

**Supplementary Figure 19. Soldering phenomenon of 2D MoS<sub>2</sub> catalyst on Cu foam during thermal treatment.** **a** Optical image and **b** SEM image for the catalyst without thermal treatment after loading on the Cu foam. **c** SEM image for the catalyst after thermal treatment. During HER tests, we observed that the catalyst easily falls off the Cu foam for **b**, while it is firmly attached on the Cu foam for **c**. More details are shown in Supplementary Movies 1 and 2.

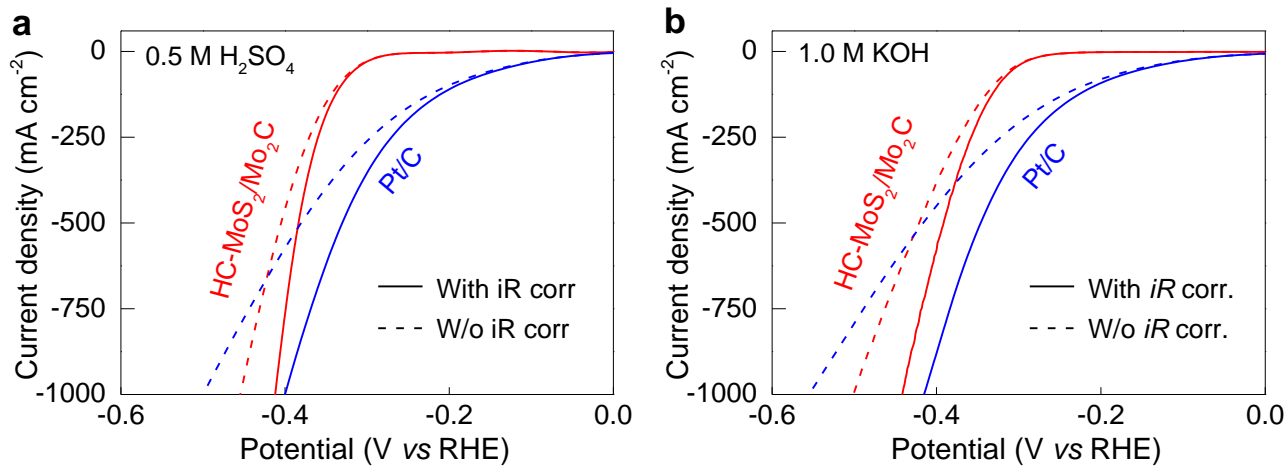

**Supplementary Figure 20. The pH-universal HER performance of the HC-MoS<sub>2</sub>/Mo<sub>2</sub>C catalysts.**

Polarization curves of HC-MoS<sub>2</sub>/Mo<sub>2</sub>C and 2.0 mg cm<sup>-2</sup> Pt/C in 0.5 M H<sub>2</sub>SO<sub>4</sub> and 1.0 M KOH **a** without *iR* correction and **b** with *iR* correction. The results showed that HC-MoS<sub>2</sub>/Mo<sub>2</sub>C had good performance in both acidic and alkaline media.



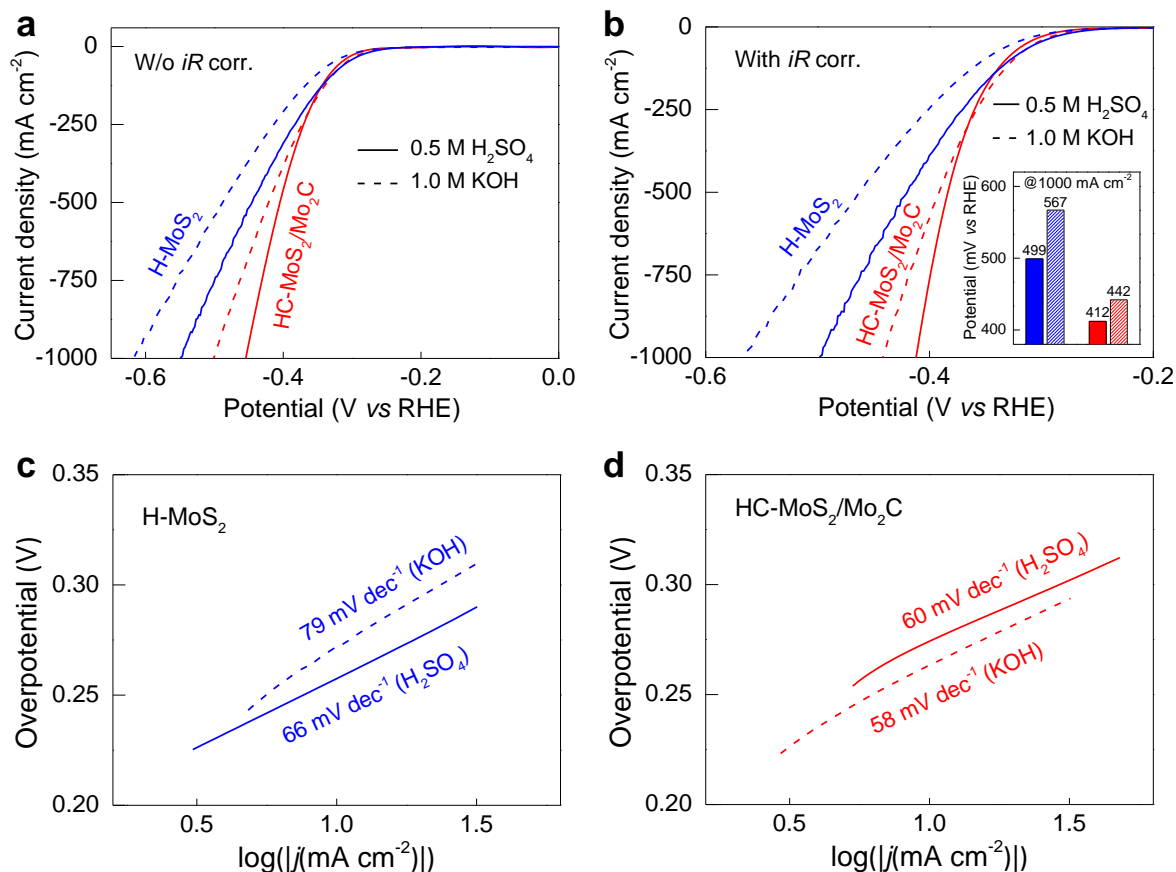

**Supplementary Figure 21. The pH-universal HER performance of the HC-MoS<sub>2</sub>/Mo<sub>2</sub>C in 0.5 M H<sub>2</sub>SO<sub>4</sub> and 1.0 M KOH.** Polarization curves of H-MoS<sub>2</sub> and HC-MoS<sub>2</sub>/Mo<sub>2</sub>C **a** without and **b** with  $iR$  correction. The inset of **b** is their corresponding overpotentials at 10  $\text{mA cm}^{-2}$ . Tafel plots of **c** H-MoS<sub>2</sub> and **d** HC-MoS<sub>2</sub>/Mo<sub>2</sub>C in different electrolytes. The results showed that HC-MoS<sub>2</sub>/Mo<sub>2</sub>C is pH-universal and Mo<sub>2</sub>C may play important role in the performance improvement of the HC-MoS<sub>2</sub>/Mo<sub>2</sub>C catalyst in alkaline media.

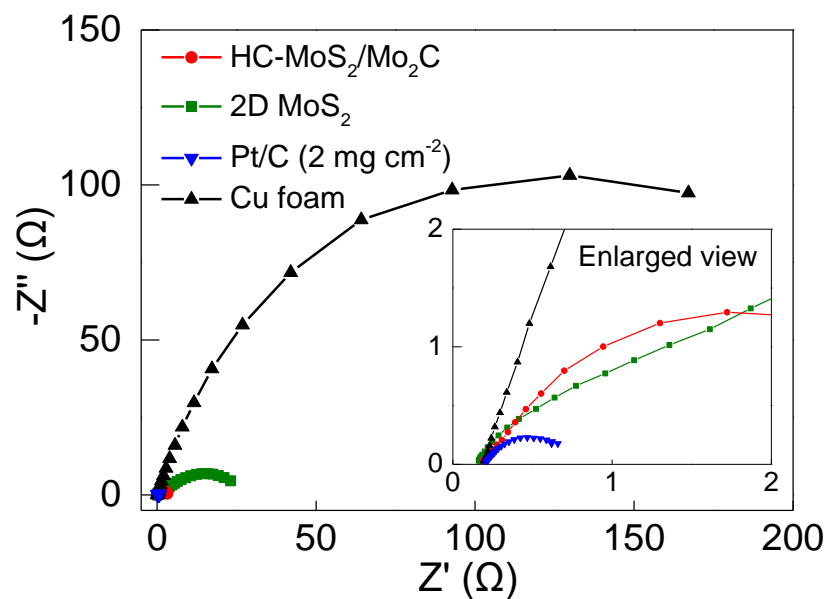

**Supplementary Figure 22. EIS curves.** Samples including HC-MoS<sub>2</sub>/Mo<sub>2</sub>C, exfoliated 2D MoS<sub>2</sub>, 2 mg cm<sup>-2</sup> Pt/C, and Cu foam were tested in 0.5 M H<sub>2</sub>SO<sub>4</sub> solutions. The results show that we could reduce  $R_s$  for all catalysts to similar small values.

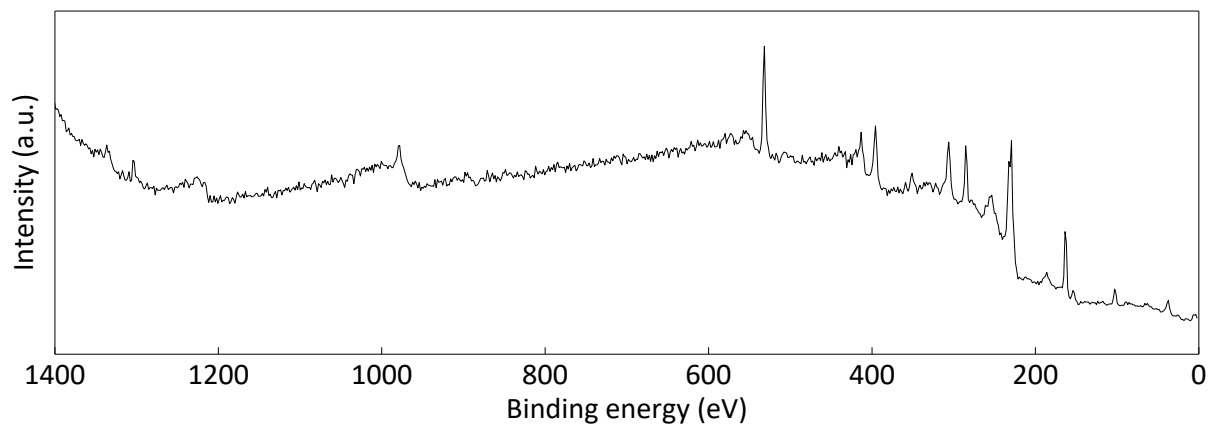

| O     | S     | Mo    | Si    | Mg   | Ca   | Al   | Fe   | W    | Na   |
|-------|-------|-------|-------|------|------|------|------|------|------|
| 39.0% | 24.4% | 13.7% | 10.7% | 4.4% | 3.0% | 1.4% | 1.4% | 1.2% | 0.9% |

**Supplementary Figure 23. XPS results of molybdenite concentrate.** The percentages of different elements are in a unit of at%. These results show that large amounts of impurities such as silicate are in the surface of the concentrate.

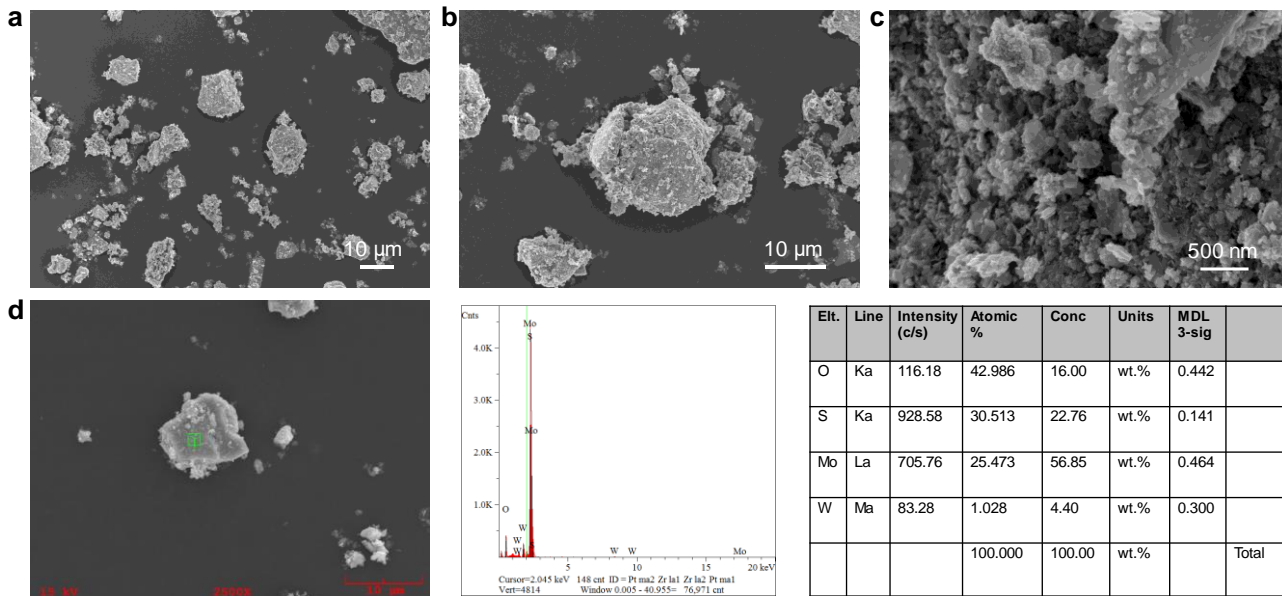

**Supplementary Figure 24. Morphology and element content of the molybdenite concentrate. a-c** SEM images and **d** EDS analysis of molybdenite concentrate. The results show that besides layered  $\text{MoS}_2$ , there are lots of impurities in the bulk of molybdenite concentrate.

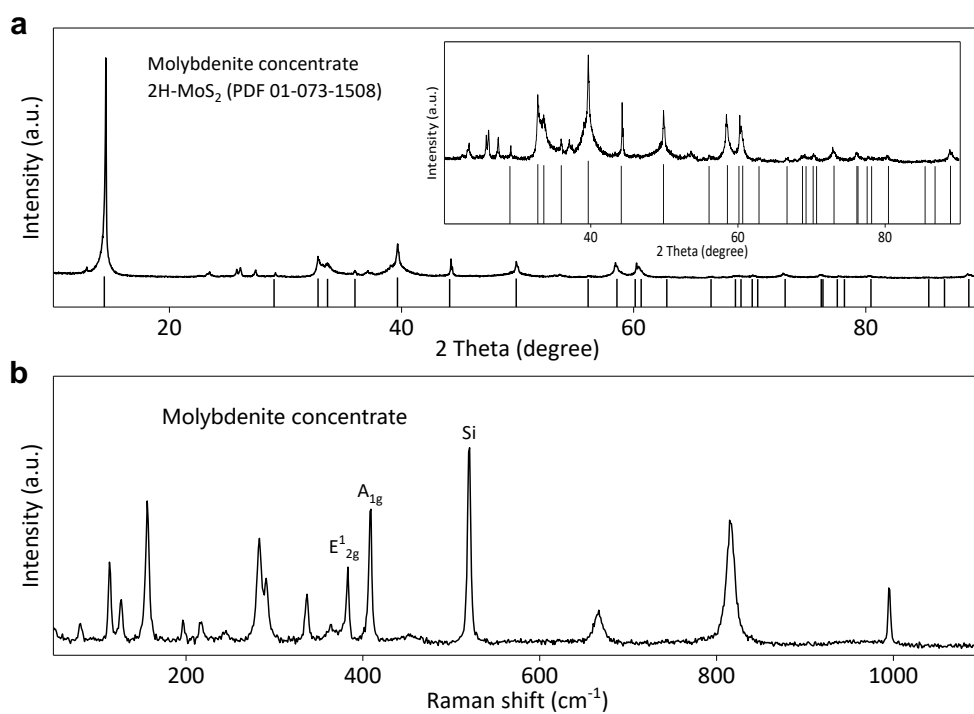

**Supplementary Figure 25. Characterization of molybdenite concentrate.** **a** XRD and **b** Raman spectrum of molybdenite concentrate. The results show it is mainly composed of 2H-phase MoS<sub>2</sub> (XRD result) and some molybdenum oxides (Raman result).

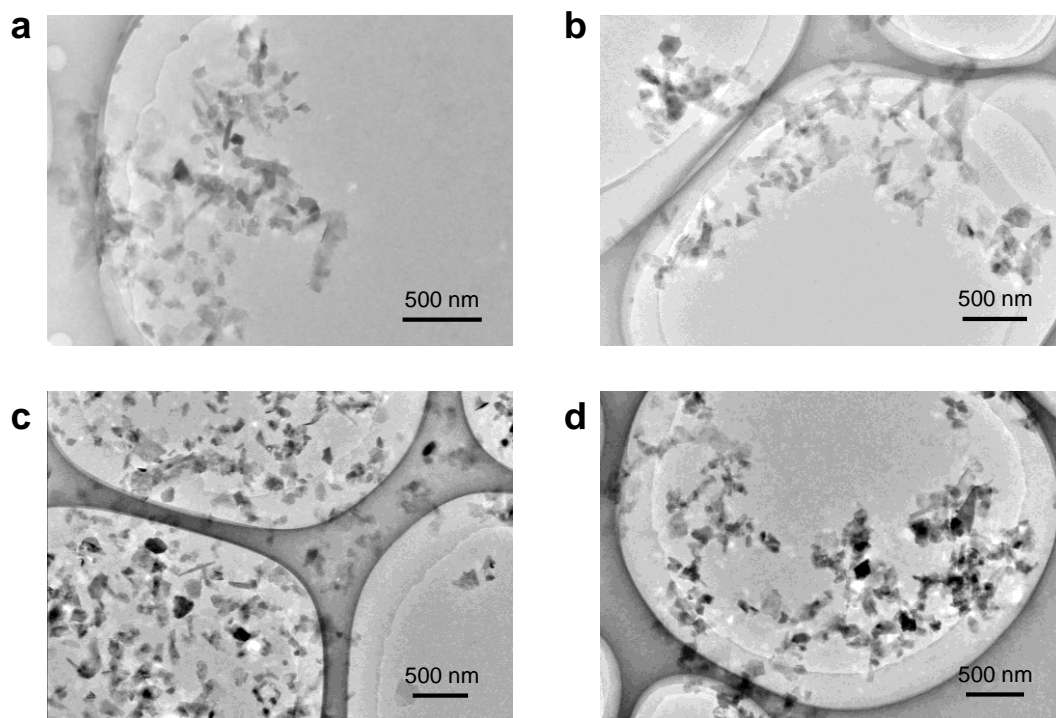

**Supplementary Figure 26. TEM images of the iMAGE exfoliated 2D MoS<sub>2</sub> from molybdenite concentrate. a-d** TEM images showing several samples of 2D MoS<sub>2</sub> from molybdenite concentrate.



**a**

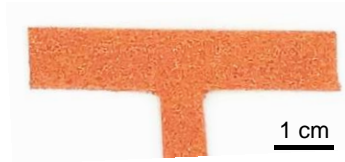

**b**

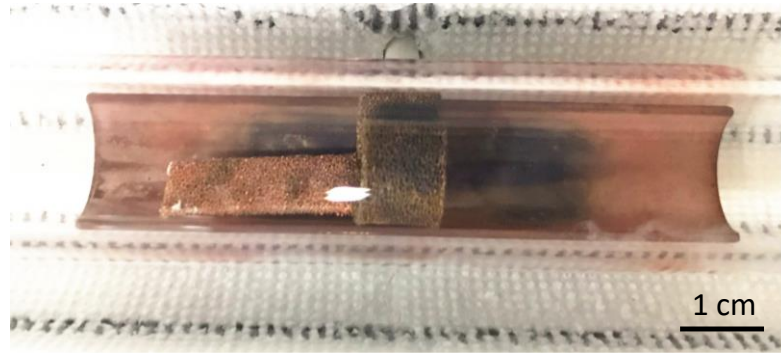

**Supplementary Figure 27. Optical images of the large Cu foam sample. It has a size of 1 cm × 5 cm and the following thermal treatment.**

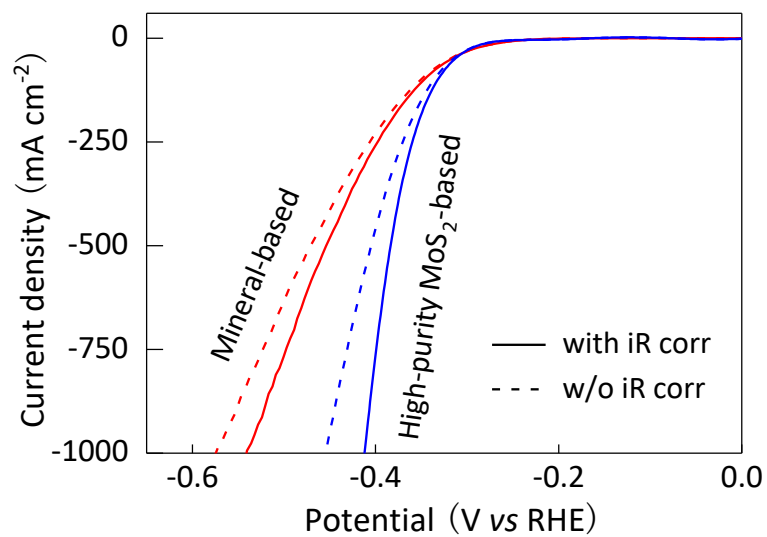

**Supplementary Figure 28. HER performance.** The results show the difference between the cheap MoS<sub>2</sub> mineral-based catalyst (molybdenite concentrate) and the high-purity MoS<sub>2</sub>-based catalyst.

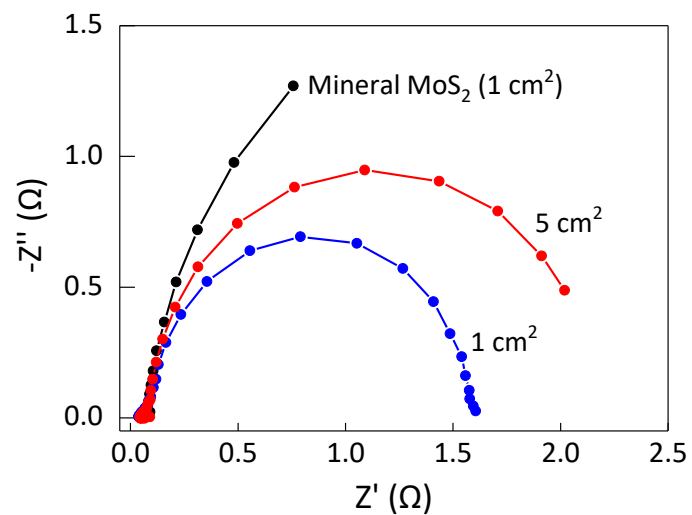

**Supplementary Figure 29. EIS curves.**  $\text{MoS}_2$  mineral-based electrodes have areas of  $1 \text{ cm}^2$  and  $5 \text{ cm}^2$ . The results showed that compared with as-received mineral,  $\text{MoS}_2$  mineral-based electrocatalysts including  $1 \text{ cm}^2$  and  $5 \text{ cm}^2$  samples showed small charge transfer resistances for HER.

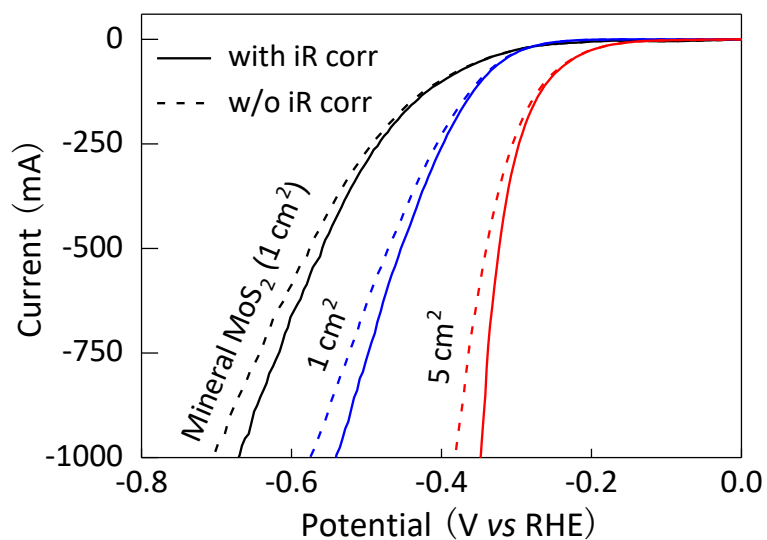

**Supplementary Figure 30. Polarization curves of the different MoS<sub>2</sub>-mineral-based catalysts.** All the samples were tested in 0.5 M H<sub>2</sub>SO<sub>4</sub> solutions. Curves both with and without *iR* corrections are provided for each sample.

**Supplementary Table 1.** A comparison of the highest current density and production rate of catalysts in this work with previously reported data.

| Synthesis method                      | Catalysts                              | Highest current density (mA cm <sup>-2</sup> ) | Production rate (mg h <sup>-1</sup> ) | Notes                          | Ref       |
|---------------------------------------|----------------------------------------|------------------------------------------------|---------------------------------------|--------------------------------|-----------|
| Top-down grinding exfoliation (iMAGE) | HC-MoS <sub>2</sub> /Mo <sub>2</sub> C | 1,000                                          | 1,250                                 | N/A                            | This work |
| Tip sonication exfoliation            | Exfoliated MoS <sub>2</sub>            | 200                                            | 9.5                                   | Assumption of 100% exfoliation | 5         |
| Li intercalation exfoliation          | WS <sub>2</sub>                        | 30                                             | 6.3                                   | Assumption of 100% exfoliation | 6         |
| Li intercalation exfoliation          | 1T MoS <sub>2</sub>                    | 40                                             | 4.2                                   | Assumption of 100% exfoliation | 7         |
| Li intercalation exfoliation          | n-BuLi treated MoS <sub>2</sub>        | 200                                            | 4.9                                   | Assumption of 100% exfoliation | 8         |
| Gas-solid reaction                    | MoS <sub>2</sub>                       | 8                                              | 0.02                                  | Given in the ref               | 9         |
| Gas-solid reaction                    | MoSe <sub>2</sub>                      | 8                                              | 0.03                                  | Given in the ref               | 9         |
| Gas-solid reaction                    | MoS <sub>2</sub>                       | 200                                            | 1.6                                   | Given in the ref               | 10        |
| Gas-solid reaction                    | 2H Nb <sub>1.35</sub> S <sub>2</sub>   | 5000                                           | 0.1                                   | Given in the ref               | 11        |
| Solvothermal synthesis                | MoS <sub>2</sub>                       | 12                                             | 56                                    | Assumption of 100% conversion  | 12        |
| Solvothermal synthesis                | MoS <sub>2</sub> /Mo <sub>2</sub> C    | 20                                             | 0.2                                   | Given in the ref               | 13        |

| Synthesis method       | Catalysts                           | Highest current density (mA cm <sup>-2</sup> ) | Production rate (mg h <sup>-1</sup> ) | Notes                                            | Ref |
|------------------------|-------------------------------------|------------------------------------------------|---------------------------------------|--------------------------------------------------|-----|
| Solvothermal synthesis | MoS <sub>2</sub>                    | 30                                             | 62                                    | Assumption of 100% conversion                    | 14  |
| Solvothermal synthesis | C@MoS <sub>2</sub>                  | 35                                             | 1.1                                   | Assumption of 100% conversion                    | 15  |
| Solvothermal synthesis | MoS <sub>2</sub>                    | 40                                             | 0.05                                  | Assumption of 100% conversion                    | 16  |
| Solvothermal synthesis | MoS <sub>2</sub> /N-RGO             | 50                                             | 8.8                                   | Assumption of 100% conversion                    | 17  |
| Solvothermal synthesis | hH-MoS <sub>2</sub>                 | 60                                             | 14                                    | Assumption of 100% conversion                    | 18  |
| Solvothermal synthesis | MoS <sub>2</sub> /RGO               | 80                                             | 1.5                                   | Conversion rate has been given as 90% in the ref | 19  |
| Solvothermal synthesis | MoS <sub>2</sub>                    | 120                                            | 47                                    | Assumption of 100% conversion                    | 20  |
| Solvothermal synthesis | MoS <sub>2</sub> /Mo <sub>2</sub> C | 1000                                           | 6.4                                   | Assumption of 100% conversion                    | 21  |

**Supplementary Table 2.** A comparison of the HER activity of the HC-Mo<sub>2</sub>S/Mo<sub>2</sub>C catalyst in this work with previously reported data and our tested data of Pt-based catalysts. N/A stands for Not Available.

| Catalysts                              | Loading mass (mg cm <sup>-2</sup> ) | Electrolyte                          | Potential @ 1000 mA cm <sup>-2</sup> (mV), w/o <i>iR</i> corr. | $\eta$ @ 1000 mA cm <sup>-2</sup> (mV), with <i>iR</i> corr. | $\Delta\eta/\Delta\log j$ @ 1000 mA cm <sup>-2</sup> | Ref.      |
|----------------------------------------|-------------------------------------|--------------------------------------|----------------------------------------------------------------|--------------------------------------------------------------|------------------------------------------------------|-----------|
| HC-Mo <sub>2</sub> S/Mo <sub>2</sub> C | 10                                  | 0.5 M H <sub>2</sub> SO <sub>4</sub> | 455                                                            | 412                                                          | 91.95 ± 2.92                                         | This work |
| HC-Mo <sub>2</sub> S/Mo <sub>2</sub> C | 10                                  | 1.0 M KOH                            | 501                                                            | 441                                                          | 100.6 ± 9.98                                         | This work |
| 20 wt% Pt/C                            | 2                                   | 0.5 M H <sub>2</sub> SO <sub>4</sub> | 500                                                            | 400                                                          | 237.70 ± 14.24                                       | This work |
| 20 wt% Pt/C                            | 2                                   | 1.0 M KOH                            | 555                                                            | 415                                                          | 234.81 ± 4.41                                        | This work |
| 20 wt% Pt/C                            | 0.5                                 | 0.5 M H <sub>2</sub> SO <sub>4</sub> | 622                                                            | 511                                                          | 364.16 ± 25.08                                       | This work |
| 20 wt% Pt/C                            | 0.2                                 | 0.5 M H <sub>2</sub> SO <sub>4</sub> | 763                                                            | 658                                                          | 657.55 ± 140.72                                      | This work |
| Pt mesh                                | N/A                                 | 0.5 M H <sub>2</sub> SO <sub>4</sub> | 1074                                                           | 958                                                          | 1551.72 ± 285.48                                     | This work |
| Pt foil                                | N/A                                 | 0.5 M H <sub>2</sub> SO <sub>4</sub> | ~1220                                                          | ~1170                                                        | 1141.95 ± 338.85                                     | This work |
| 40 wt% Pt/C                            | N/A                                 | 0.5 M H <sub>2</sub> SO <sub>4</sub> | N/A                                                            | 1107                                                         | 4365.02 ± 505.02                                     | 22        |
| 20 wt% Pt/C                            | N/A                                 | 0.5 M H <sub>2</sub> SO <sub>4</sub> | 980                                                            | 400                                                          | 528.22 ± 78.14                                       | 23        |
| 20 wt% Pt/C/Nafion                     | 0.2                                 | 0.5 M H <sub>2</sub> SO <sub>4</sub> | N/A                                                            | 670                                                          | N/A                                                  | 21        |
| Pt foil                                | N/A                                 | 0.5 M H <sub>2</sub> SO <sub>4</sub> | N/A                                                            | 660                                                          | 2035.34 ± 567.94                                     | 21        |
| Pt foil                                | N/A                                 | 1.0 M KOH                            | N/A                                                            | 822                                                          | 702.80 ± 28.55                                       | 21        |
| Pt wire                                | N/A                                 | 1.0 M KOH                            | N/A                                                            | 388                                                          | 676.81 ± 31.98                                       | 24        |

**Supplementary Table 3.** A comparison of the high-current-density HER performance of the catalysts in this work with previously reported data of non-noble metal catalysts. N/A stands for Not Available.

| Catalysts                               | Loading mass<br>(mg cm <sup>-2</sup> ) | Electrolyte                          | Potential @ 1000<br>mA cm <sup>-2</sup> (mV),<br>w/o <i>iR</i> corr. | $\eta$ @ 1000 mA<br>cm <sup>-2</sup> (mV),<br>with <i>iR</i> corr. | Ref.         |
|-----------------------------------------|----------------------------------------|--------------------------------------|----------------------------------------------------------------------|--------------------------------------------------------------------|--------------|
| HC-Mo <sub>2</sub> S/Mo <sub>2</sub> C  | 10                                     | 0.5 M H <sub>2</sub> SO <sub>4</sub> | 455                                                                  | 412                                                                | This<br>work |
| HC-Mo <sub>2</sub> S/Mo <sub>2</sub> C  | 10                                     | 1.0 M KOH                            | 501                                                                  | 441                                                                | This<br>work |
| $\alpha$ -MoB <sub>2</sub>              | N/A                                    | 0.5 M H <sub>2</sub> SO <sub>4</sub> | 790                                                                  | 334                                                                | 23           |
| LiCoBPO/NF                              | 1                                      | 1.0 M KOH                            | N/A                                                                  | 400                                                                | 25           |
| NaCoBPO/NF                              | 1                                      | 1.0 M KOH                            | N/A                                                                  | 520                                                                | 25           |
| Ni <sub>2</sub> P                       | 7.4                                    | 1.0 M KOH                            | N/A                                                                  | 620                                                                | 24           |
| Ni <sub>2(1-x)</sub> Mo <sub>2x</sub> P | 7.4                                    | 1.0 M KOH                            | N/A                                                                  | 300                                                                | 24           |
| MoS <sub>2</sub> /Mo <sub>2</sub> C     | 0.3                                    | 0.5 M H <sub>2</sub> SO <sub>4</sub> | 600                                                                  | 250                                                                | 21           |
| MoS <sub>2</sub> /Mo <sub>2</sub> C     | 0.3                                    | 1.0 M KOH                            | 420                                                                  | 220                                                                | 21           |
| Co-Co <sub>2</sub> P@NPC/rGO            | N/A                                    | 0.5 M H <sub>2</sub> SO <sub>4</sub> | 900                                                                  | N/A                                                                | 26           |



**Supplementary Table 4.** Calculations of H<sub>2</sub> production rate in Fig. 4 in the main text, taken 1 Amper

(1A) as an example.

|   | Parameters                                                | Operating                  | Answer                |
|---|-----------------------------------------------------------|----------------------------|-----------------------|
| 1 | Current value (Amper, A)                                  | 1                          | 1                     |
| 2 | Quantity of electric charge (C s <sup>-1</sup> )          | ×1                         | 1                     |
| 3 | Quantity of electrons (s <sup>-1</sup> )                  | × (6.25×10 <sup>18</sup> ) | 6.25×10 <sup>18</sup> |
| 4 | Quantity of as-prepared H <sub>2</sub> (s <sup>-1</sup> ) | ÷2                         | 3.13×10 <sup>18</sup> |
| 5 | H <sub>2</sub> mol amount (mol s <sup>-1</sup> )          | ÷ (6.02×10 <sup>23</sup> ) | 5.2×10 <sup>-6</sup>  |
| 6 | H <sub>2</sub> mass amount (g s <sup>-1</sup> )           | ×2                         | 1×10 <sup>-5</sup>    |
| 7 | H <sub>2</sub> mass amount (mg h <sup>-1</sup> )          | × (3600 ×1000)             | 37.4                  |

**Supplementary Table 5.** A comparison of the prices of catalysts in this work compared to commercial electrocatalysts for HER in acidic media.

| Catalysts                                                 | Materials                               | Suppliers                                                | Price (US\$)          | Price per 1 m <sup>2</sup> catalyst (US\$)         |
|-----------------------------------------------------------|-----------------------------------------|----------------------------------------------------------|-----------------------|----------------------------------------------------|
| HC-Mo <sub>2</sub> S/Mo <sub>2</sub> C<br>(This work)     | Molybdenite concentrates                | China Molybdenum Co., Ltd.                               | 0.26 kg <sup>-1</sup> | 10 (10 mg cm <sup>-2</sup> , w/o support) in total |
| HC-Mo <sub>2</sub> S/Mo <sub>2</sub> C<br>(This work)     | Mo <sub>2</sub> C additive              | Qinghuangdao ENO High-Tech Material Development Co. Ltd. | 40 kg <sup>-1</sup>   |                                                    |
| Supports<br>(This work)                                   | Ni foam                                 | Linyi Gelon LIB Co., Ltd.                                | 30 m <sup>2</sup>     | 30                                                 |
| Supports<br>(This work)                                   | Carbon cloth                            | Jiangsu Sutong Carbon Fiber Co., Ltd                     | 250 m <sup>2</sup>    | 250                                                |
| Supports<br>(This work)                                   | Cu foam                                 | Kunshan Guangjiayuan Electronic Tech Co. Ltd.            | 280 m <sup>2</sup>    | 280                                                |
| Pt/C                                                      | 10 wt.% Pt/C powder                     | Alfa Aesar                                               | 36 g <sup>-1</sup>    | 360 (1 mg cm <sup>-2</sup> , w/o support)          |
| Pt/C                                                      | 20 wt.% Pt/C powder                     | Alfa Aesar                                               | 206 g <sup>-1</sup>   | 4120 (2 mg cm <sup>-2</sup> , w/o support)         |
| Pt black on carbon paper                                  | Pt black<br>2 mg cm <sup>-2</sup>       | Fuel Cell Store                                          | 1.35 cm <sup>2</sup>  | 13,500                                             |
| Pt black on carbon cloth                                  | Pt black<br>2 mg cm <sup>-2</sup>       | Fuel Cell store                                          | 0.91 cm <sup>2</sup>  | 9,100                                              |
| Pt/C on carbon cloth                                      | 60 wt.% Pt/C<br>0.5 mg cm <sup>-2</sup> | Fuel Cell store                                          | 0.45 cm <sup>2</sup>  | 4,500                                              |
| Pt commodity                                              | Pt                                      | Shanghai Gold Exchange                                   | 27 g <sup>-1</sup>    | N/A                                                |
| Raney Ni                                                  | >90% Ni<br><10% Al                      | Jiangsu Leini Metal Tech. Co., Ltd                       | 50 kg <sup>-1</sup>   | 30 (60 mg cm <sup>-2</sup> , w/o support)          |
| MoS <sub>2</sub> solid lubricant on Mo foil <sup>27</sup> | MoS <sub>2</sub> (30% solid content)    | OKS 111, Germany                                         | 470 kg <sup>-1</sup>  | 47 (10 mg cm <sup>-2</sup> , w/o Mo support)       |
| MoS <sub>2</sub> solid lubricant on Mo foil <sup>27</sup> | Mo foil support                         | Luoyang Tuoqing Refractory Metal Co., Ltd.               | 613 m <sup>2</sup>    | 613                                                |

## Supplementary references

1. National minerals information center. Available from: <https://www.usgs.gov/centers/nmic/commodity-statistics-and-information>.
2. Liu, Z., et al., Unique domain structure of two-dimensional  $\alpha$ -Mo<sub>2</sub>C superconducting crystals. *Nano Lett.* **16**, 4243-4250 (2016).
3. Chen, J., et al., Ag@MoS<sub>2</sub> core-shell heterostructure as SERS platform to reveal the hydrogen evolution active sites of single-layer MoS<sub>2</sub>. *J. Am. Chem. Soc.* **142**, 7161-7167 (2020).
4. Young, A. P., et al., A semi-empirical two step carbon corrosion reaction model in PEM fuel cells. *J. Electrochem. Soc.* **160**, 381-388 (2013).
5. Gopalakrishnan, D., Damien, D. & Shaijumon, M. M. MoS<sub>2</sub> quantum dot-interspersed exfoliated MoS<sub>2</sub> nanosheets. *ACS nano* **8**, 5297-5303 (2014).
6. Voiry, D., et al., Enhanced catalytic activity in strained chemically exfoliated WS<sub>2</sub> nanosheets for hydrogen evolution. *Nat. Mater.* **12**, 850-855 (2013).
7. Voiry, D., et al., Conducting MoS<sub>2</sub> nanosheets as catalysts for hydrogen evolution reaction. *Nano Lett.* **13**, 6222-6227 (2013).
8. Lukowski, M. A., et al., Enhanced hydrogen evolution catalysis from chemically exfoliated metallic MoS<sub>2</sub> nanosheets. *J. Am. Chem. Soc.* **135**, 10274-10277 (2013).
9. Kong, D., et al., Synthesis of MoS<sub>2</sub> and MoSe<sub>2</sub> films with vertically aligned layers. *Nano Lett.* **13**, 1341-1347 (2013).
10. Wang, H., et al., Electrochemical tuning of MoS<sub>2</sub> nanoparticles on three-dimensional substrate for efficient hydrogen evolution. *ACS nano* **8**, 4940-4947 (2014).
11. Yang, J., et al., Ultrahigh-current-density niobium disulfide catalysts for hydrogen evolution. *Nat. Mater.* **18**, 1309-1314 (2019).
12. Wang, D., et al., Hydrothermal synthesis of MoS<sub>2</sub> nanoflowers as highly efficient hydrogen evolution reaction catalysts. *J. Power Sources* **264**, 229-234 (2014).
13. Zhao, Z., et al., Vertically aligned MoS<sub>2</sub>/Mo<sub>2</sub>C hybrid nanosheets grown on carbon paper for efficient electrocatalytic hydrogen evolution. *ACS Catal.* **7**, 7312-7318 (2017).
14. Zhang, S., et al., Constructing highly oriented configuration by few-layer MoS<sub>2</sub>: toward high-performance lithium-ion batteries and hydrogen evolution reactions. *ACS nano* **9**, 12464-12472

(2015).

15. Yu, X. Y., et al., Ultrathin MoS<sub>2</sub> nanosheets supported on n-doped carbon nanoboxes with enhanced lithium storage and electrocatalytic properties. *Angew. Chem. Int. Edit.* **54**, 7395-7398 (2015).
16. Yan, Y., et al., Ultrathin MoS<sub>2</sub> nanoplates with rich active sites as highly efficient catalyst for hydrogen evolution. *ACS Appl. Mater. Inter.* **5**, 12794-12798 (2013).
17. Tang, Y. J., et al., Molybdenum disulfide/nitrogen-doped reduced graphene oxide nanocomposite with enlarged interlayer spacing for electrocatalytic hydrogen evolution. *Adv. Energy Mater.* **6**, 1600116 (2016).
18. Guo, B., et al., Hollow structured micro/nano MoS<sub>2</sub> spheres for high electrocatalytic activity hydrogen evolution reaction. *ACS Appl. Mater. Inter.* **8**, 5517-5525 (2016).
19. Li, Y., et al., MoS<sub>2</sub> nanoparticles grown on graphene: an advanced catalyst for the hydrogen evolution reaction. *J. Am. Chem. Soc.* **133**, 7296-7299 (2011).
20. Xie, J., et al., Controllable disorder engineering in oxygen-incorporated MoS<sub>2</sub> ultrathin nanosheets for efficient hydrogen evolution. *J. Am. Chem. Soc.* **135**, 17881-17888 (2013).
21. Luo, Y., et al., Morphology and surface chemistry engineering toward pH-universal catalysts for hydrogen evolution at high current density. *Nat. Comm.* **10**, 269-277 (2019).
22. Zhu, L., et al., A rhodium/silicon co-electrocatalyst design concept to surpass platinum hydrogen evolution activity at high overpotentials. *Nat. Comm.* **7**, 12272-12278 (2016).
23. Chen, Y., et al., Highly active, nonprecious electrocatalyst comprising borophene subunits for the hydrogen evolution reaction. *J. Am. Chem. Soc.* **139**, 12370-12373 (2017).
24. Yu, L., et al., Ternary Ni<sub>2(1-x)</sub>Mo<sub>2x</sub>P nanowire arrays toward efficient and stable hydrogen evolution electrocatalysis under large-current-density. *Nano Energy* **53**, 492-500 (2018).
25. Menezes, P. W., et al., Helical cobalt borophosphates to master durable overall water-splitting. *Energ. Environ. Sci.* **12**, 988-999 (2019).
26. Li, G., et al., Cobalt–cobalt phosphide nanoparticles@nitrogen-phosphorus doped carbon/graphene derived from cobalt ions adsorbed saccharomycete yeasts as an efficient, stable, and large-current-density electrode for hydrogen evolution reactions. *Adv. Funct. Mater.* **28**, 1801332 (2018).

27. Kiriya, D., et al., General thermal texturization process of MoS<sub>2</sub> for efficient electrocatalytic hydrogen evolution reaction. *Nano Lett.*, **16**, 4047-4053 (2016).
